# Supplementary material for: Egg yolk phosphatidylcholine alleviates DSS-induced colitis in BALB/c mice
Source: Royal Society of Chemistry journal article supplement (doi:10.1039/d3fo02885b), 2023-01-01
Supplement: d3fo02885b1.pdf [file d3fo02885b1.pdf]

## Supporting Information for Methods

**Table S1.** DAI scoring method

| Score | Body weight loss | Diarrhea         | Blood in feces        |
|-------|------------------|------------------|-----------------------|
| 0     | None             | Normal           | None                  |
| 1     | 1-5%             | Loose stool (+)  | Occult bleeding (+)   |
| 2     | 5-10%            | Loose stool (++) | Occult bleeding (++)  |
| 3     | 10-15%           | Diarrhea (+++)   | Gross bleeding (+++)  |
| 4     | 15-20%           | Diarrhea (++++)  | Gross bleeding (++++) |

**Table S2.** Histological scoring method

| Score | Inflammation                                                                                                          | Crypt damage                                                                  | Ulceration                             | Edema   |
|-------|-----------------------------------------------------------------------------------------------------------------------|-------------------------------------------------------------------------------|----------------------------------------|---------|
| 0     | No infiltrate                                                                                                         | None                                                                          | None                                   | Absent  |
| 1     | Occasional cell limited to submucosa                                                                                  | Some crypt damage, spaces between crypts                                      | Small, focal ulcers                    | Present |
| 2     | Significant presence of inflammatory cells in submucosa, limited to focal areas                                       | Some crypt damage, spaces between crypts                                      | Frequent small ulcers                  |         |
| 3     | Infiltrate present in both submucosa and lamina propria, limited to focal areas                                       | Larger spaces between crypts, loss of goblet cells, some shortening of crypts | Large areas lacking surface epithelium |         |
| 4     | Large amount of infiltrate in submucosa, lamina propria and surrounding blood vessels, covering large areas of mucosa | Large areas without crypts, surrounded by normal crypts                       |                                        |         |
| 5     | Transmural inflammation (Mucosa to muscularis)                                                                        |                                                                               |                                        |         |
